# Frequency of Pancreatic Hyperamylasemia in Human Immunodeficiency Virus-Positive Patients in the Highly Active Antiretroviral Therapy Era

Dominika Szöke, MD, PhD,<sup>1</sup> Annalisa Ridolfo, MD,<sup>2</sup> Cristina Valente, MD,<sup>1</sup> Massimo Galli, MD,<sup>2</sup> and Mauro Panteghini, MD<sup>1</sup>

From the <sup>1</sup>Clinical Pathology Unit, and <sup>2</sup>Department of Infectious Diseases, “Luigi Sacco” University Hospital, Milan, Italy.

**Key Words:** HIV; Highly active antiretroviral therapy (HAART); Pancreatic hyperamylasemia

*Am J Clin Pathol* January 2016;145:128-133

DOI: 10.1093/AJCP/AQV020

## ABSTRACT

**Objectives:** Increased frequency of hyperamylasemia has previously been reported in human immunodeficiency virus (HIV)-positive patients, but studies determined total amylase activity and were performed before the introduction of highly active antiretroviral therapy (HAART). We evaluated the frequency of pancreatic hyperamylasemia in a large HIV+ population mostly treated with HAART.

**Methods:** The upper reference limit (URL) for pancreatic amylase (P-AMY) was derived from 299 healthy blood donors. A cross-sectional study was then performed on samples obtained from 1,548 consecutive patients referred to our infectious disease clinic to assess serum P-AMY and lipase concentrations. Of the patients, 94% were HIV+, and most (92%) were taking HAART (HIV+Tx+).

**Results:** P-AMY URL was 51 U/L. The frequency of P-AMY increase did not significantly differ between HIV+ and HIV- populations (14.2% vs 15.2%,  $P = .91$ ) or between HIV+Tx+ and HIV+Tx- (14.7% vs 8.9%,  $P = .11$ ). In almost half (48.3% of HIV+ and 42.9% of HIV-) of hyperamylasemic patients, lipase was normal, indicating a non pancreatic origin of their P-AMY increase. Markedly elevated P-AMY (>3 times the URL) was found in six HIV+ patients and in one HIV- patient: two had macroamylasemia, one acute pancreatitis, three (including the HIV- patient) chronic pancreatitis, and one chronic hyperamylasemia of undefined origin.

**Conclusions:** In our study, both HIV+ and HIV+Tx+ do not show an increased frequency of P-AMY elevation. Frank pancreatic disease is rare in this clinical setting.

Upon completion of this activity you will be able to:

- describe problems regarding the definition of biochemical pancreatic abnormalities used in studies aimed to estimate the frequency of pancreatic involvement in human immunodeficiency virus (HIV)-positive patients.
- predict the approximate frequency of pancreatic hyperamylasemia in HIV+ patients with and without highly active antiretroviral therapy at different enzyme cutoffs (ie, more than the upper reference limit [URL] and more than three times the URL).
- synthesize the reasons why the pancreatic amylase measurement cannot be recommended as a screening test for detecting pancreatic injury in asymptomatic HIV+ patients.

The ASCP is accredited by the Accreditation Council for Continuing Medical Education to provide continuing medical education for physicians. The ASCP designates this journal-based CME activity for a maximum of 1 AMA PRA Category 1 Credit™ per article. Physicians should claim only the credit commensurate with the extent of their participation in the activity. This activity qualifies as an American Board of Pathology Maintenance of Certification Part II Self-Assessment Module.

The authors of this article and the planning committee members and staff have no relevant financial relationships with commercial interests to disclose.

Exam is located at [www.ascp.org/ajcpeme](http://www.ascp.org/ajcpeme).

Historically, several factors (eg, opportunistic infections, AIDS-related cancer and antineoplastic chemotherapy, and use of nucleoside analogues or antimicrobials such as pentamidine, cotrimoxazole, and antimycobacterial compounds) were suspected to cause acute or chronic pancreatic injury in patients with human immunodeficiency virus (HIV) infection (HIV+).<sup>1</sup> Even after the introduction of highly active antiretroviral therapy (HAART) in 1996, HIV+ patients continued to be exposed to multiple potential risk factors for pancreatic involvement, including the

administration of pancreatotoxic drugs, alcohol or illicit substance abuse, antiretroviral therapy-related hypertriglyceridemia, concomitant chronic liver and/or biliary disorders, opportunistic diseases and HIV infection itself, and the progressive increase of patients' age and related comorbidities.<sup>2</sup> Nonetheless, the frequency of signs and symptoms of pancreatic injury has remained relatively low, and full-blown acute pancreatitis has continued to be a rare clinical condition in HIV+ patients through the years.<sup>3,4</sup> Reisler et al<sup>5,6</sup> reported an overall acute pancreatitis rate of 0.61 per 100 person-years among 8,451 participants enrolled in 20 AIDS clinical trials group studies from 1989 to 1999 and detected pancreatitis in 0.85 per 100 person-years between 1996 and 2001 in 2,947 HIV+ patients taking HAART, while the EuroSIDA study involving 9,678 HIV+ patients observed a lower overall rate (0.13 cases per 100 person-years) in the 2001 to 2006 period.<sup>7</sup> Although these data confirm that acute pancreatitis in the HIV+ population is not a frequent disease, its incidence seems notably higher than the annual rate of acute pancreatitis in ostensibly healthy people (0.02-0.03 cases per 100).<sup>8</sup>

It is important to note that, in estimating the frequency of acute pancreatitis, the employed diagnostic criteria are crucial; for instance, in the first of the above-mentioned studies,<sup>4</sup> the use of clinical and/or laboratory criteria yielded a pancreatitis rate nearly fourfold higher than that obtained using only clinical diagnosis. On the other hand, the incidence of isolated biochemical pancreatic abnormalities showed an extended range of frequency in the pre-HAART era, generally much higher than the frequency of laboratory and/or clinically diagnosed pancreatitis.<sup>1,9</sup> Even in more recent studies, neither diagnostic criteria for pancreatitis nor the definition of *biochemical pancreatic abnormalities* are unequivocal, making it difficult to compare frequency data. In one study that examined the frequency of acute pancreatitis in a larger group of HIV+ individuals treated in Northern California during the same period (2001-2006) than did the EuroSIDA study, but using different diagnostic criteria, the annual incidence of pancreatitis was approximately five times higher than that in the EuroSIDA cohort.<sup>10</sup> It is also apparent that different diagnostic criteria are not the only factors influencing pancreatitis frequency in published studies. Differences in diet and alcohol consumption, the frequency of hepatitis C virus (HCV) coinfection, and drugs used beside antiretroviral agents have been adduced.

Acute pancreatitis is sometimes difficult to diagnose, and measurements of pancreatic enzymes have a fundamental role.<sup>11</sup> The American Gastroenterological Association and the American College of Gastroenterology recommend that the diagnosis of acute pancreatitis should be based on compatible clinical features and, in the absence of renal

failure, a more than three times the upper reference limit (URL) elevation of amylase (AMY) or lipase concentrations in serum.<sup>12,13</sup> Elevation of lipase levels is somewhat more specific and is thus preferred. Fewer than 3 times the URL elevations of pancreatic enzymes have low specificity for acute pancreatitis.<sup>14,15</sup>

Lack of specificity of total AMY determination has led to interest in the direct measurement of pancreatic AMY (P-AMY) isoenzyme instead of total enzyme activity in serum for the differential diagnosis of patients with acute abdominal pain.<sup>11,14</sup> By applying the best decision limit (ie, >3 times the URL), the clinical specificity of P-AMY for the diagnosis of acute pancreatitis is more than 90%.<sup>11</sup> The evaluation of clinical significance of elevated P-AMY concentrations in serum is sometimes complicated by the presence of macroamylase (MA), a complex of AMY and immunoglobulin G or immunoglobulin A, which is not of pathologic significance.<sup>11</sup> The presence of MA has been reported in HIV+ patients, and this may confound their clinical evaluation.<sup>9,16,17</sup> Another interesting question is whether there is any difference in the frequency of acute pancreatitis and of biochemical pancreatic abnormalities between the pre-HAART and the HAART era.

In this study, we aimed to evaluate the frequency and the degree of pancreatic hyperamylasemia in a large HIV+ population mostly treated with HAART. Increased frequency of hyperamylasemia has been reported in HIV+ patients, but most of the studies determined total AMY activity and applied nonstandard criteria for the definition of biochemical pancreatic abnormalities.<sup>1,9,18</sup> Furthermore, most studies were performed before the introduction of HAART, so possible changes in the frequency of hyperamylasemia and acute pancreatitis in HIV+ patients due to the introduction of HAART need to be evaluated.

## Materials and Methods

### Analytical Methods

Serum P-AMY and pancreatic lipase concentrations were measured using enzymatic colorimetric assays on the cobas 6000 platform (Roche Diagnostics, Basel, Switzerland).<sup>19,20</sup> Stability of both enzyme measurements was monitored during the entire study period by the internal quality control (IQC) performed daily using fresh-frozen serum material (Liquicheck Unassayed Chemistry Control Level 2, lot no. 16672; Bio-Rad, Hercules, CA): results showed an average coefficient of variation (CV) of 1.15% for P-AMY (cumulative mean, 324 U/L) and an average CV of 1.85% for lipase (cumulative mean, 57 U/L), respectively.

According to Braga et al,<sup>21</sup> this type of IQC provides, through mechanisms of retrospective evaluation, data useful for the knowledge of variability of the analytical system (eg, the reagent lot-to-lot variation) and of its daily use by the individual laboratory. During the clinical study, in all patients with P-AMY more than the URL, the presence of MA was assessed using the polyethylene glycol (PEG) precipitation method (PEG-6000 concentration, 240 g/L).<sup>22</sup> The presence of MA was confirmed if the P-AMY residual activity in the supernatant was 35% or less.<sup>23</sup>

## Reference Sample Groups

URLs of serum P-AMY, lipase, and P-AMY/lipase ratio (A/L) were experimentally determined in two separate studies. In a first study, aiming to establish the URL for P-AMY, serum samples were obtained from 300 apparently healthy blood donors (150 men and 150 women, aged 18-65 years). In a second study, performed on a different group of 120 healthy blood donors (60 men and 60 women, mean  $\pm$  SD age of  $43.7 \pm 13.7$  years), the URL for A/L was determined and the previously established URL for P-AMY (first study) and lipase<sup>24</sup> verified. A/L estimate was considered useful in showing the origin of the enzyme release, since a pancreatic injury should cause the contemporaneous release of both enzymes, with the ratio basically unaltered, whereas other nonpancreatic causes of pancreatic hyperamylasemia (eg, MA) not influencing lipase concentrations should markedly increase A/L. Reference samples were analyzed on the same day of blood collection.

## Clinical Study

Afterward, a cross-sectional prospective study was performed (enrollment period, March-August 2013) by measuring P-AMY and lipase on blood samples obtained from 1,548 consecutive participants (71.7% male; median age, 48 years [range, 21-89 years]) referred to our infectious disease inpatient clinic for evaluation. Blood samples were drawn in the clinic and immediately sent to the laboratory, where they were processed and determined for pancreatic enzymes. An independent researcher (A.R.), blinded to laboratory results, retrieved data from clinical records related to all enrolled patients. The study was done in compliance with the Helsinki Declaration of 1975, as revised in 2008, and informed consent of participants was obtained.

## Statistical Analysis

Reference intervals were derived according to the Clinical and Laboratory Standards Institute C28-A3 protocol.<sup>25</sup> Reed's criterion was used for outlier detection and the Shapiro-Wilk test for testing normality of data distribution. The 95% central reference interval was determined by the

nonparametric statistical method. Hyperamylasemia and hyperlipasemia frequency data were compared between different patient groups using the  $\chi^2$  test. A value of  $P < .05$  was considered statistically significant. All statistical evaluations were performed using the MedCalc (Ostend, Belgium) v.12.7.5 software package.

## Results

In the first substudy, aimed to determine the reference interval for P-AMY, one outlier result from 300 samples was detected and excluded from the analysis. Using the nonparametric statistical method (Shapiro-Wilk test rejected normality of data distribution,  $P < .0001$ ), the following reference interval (90% confidence interval in parentheses) was found for P-AMY in serum: 13 (11-13) U/L to 51 (46-54) U/L, with no sex difference. These results were confirmed (ie, 12-50 U/L) in the second substudy, analyzing the P-AMY concentrations of 120 additional blood donors. Furthermore, results were quite similar to those previously determined by Junge et al<sup>26</sup> using the same method on a different population (13-53 U/L,  $n = 775$ ). Consequently, 51 U/L was henceforth applied in our study as the URL for P-AMY to define pancreatic hyperamylasemia in the following clinical study. From data of the second reference substudy, we first derived the lipase reference interval (data not normally distributed,  $P < .0001$ ) as 17 U/L (12-19) to 64 U/L (53-104) and then calculated the A/L reference interval as 0.40 (0.36-0.48) to 1.73 (1.37-2.13).

In the clinical study, 1,456 (94%) of 1,548 patients were HIV+, with most (92%) receiving HAART therapy (Table 1). The remaining 92 (6%) patients were HIV-, affected by conditions such as HCV or hepatitis B virus infection ( $n = 58$ ), other liver disease ( $n = 5$ ), rheumatic disease ( $n = 6$ ), nonviral infections ( $n = 13$ ), and other miscellaneous conditions ( $n = 10$ ). Serum P-AMY more than the URL was found in 14.3% of enrolled patients, and the frequency of pancreatic hyperamylasemia did not significantly differ between HIV+ and HIV- populations (14.2% vs 15.2%,  $P = .91$ ) or between HIV+ patients taking HAART and those who did not (14.7% vs 8.9%,  $P = .11$ ). In almost half (48.3% of HIV+ and 42.9% of HIV- patients,  $P = .91$ ) of hyperamylasemic patients, lipase concentrations were normal ( $\leq 64$  U/L), indicating a probable nonpancreatic origin of their P-AMY increase. However, in only 8 of these patients (all HIV+) was MA accountable for hyperamylasemia (Table 2). Although no patients with concomitant hyperamylasemia and hyperlipasemia (ie, P-AMY  $> 51$  U/L and lipase  $> 64$  U/L) had MA detected, in two MA cases, A/L remained less than 1.73 and failed to recognize the

condition, indicating that this ratio has a limited role in screening MA.

Markedly elevated P-AMY concentrations (>3 times the URL) were found in only six HIV+ patients and one HIV– patient (Figure 1 and Table 3); two had MA (displaying the highest P-AMY activities), one acute pancreatitis, three (including the HIV– patient) chronic pancreatitis, and one chronic pancreatic hyperenzymemia of undefined origin.

## Discussion

Pancreatic injury found in HIV+ patients during the pre-HAART era generally resulted from an extended exposure to multiple medications and/or concurrent AIDS-related disorders. The spectrum of potential risk factors for pancreatotoxicity has changed but not diminished with the introduction of HAART, which has significantly modified the natural history and outcomes of HIV disease, transforming it into a predominantly chronic, treatable disorder characterized by a sharp drop of immunodeficiency-related complications and a concurrent increase of drug-associated long-term toxicity.<sup>2</sup> Studies evaluating the presence of hyperamylasemia in HIV+ patients before the introduction of HAART showed an increased

frequency of this condition,<sup>1,9,16,18</sup> even if its amount was dependent on the employed detection criteria. For instance, in the small study by Argiris et al,<sup>18</sup> an asymptomatic, “mild-to-moderate” rise of serum total AMY or lipase concentrations was found in 60% of HIV+ patients at any time of their clinical history, but this rate dropped to 14% when a threshold of more than 2 times the URLs for defining an enzyme elevation was applied. The lack of agreement among studies in defining biochemical pancreatic abnormalities made, therefore, results hardly comparable. Regrettably, the same was also true for the detection of overt acute pancreatitis.<sup>5,8,10</sup>

Our results in a large cohort of patients using a URL derived with a very robust protocol indicate the presence of pancreatic hyperamylasemia in approximately 14% of HIV+ patients. An important observation in our study is that neither HIV infection nor HAART increased the rate of pancreatic hyperamylasemia in comparison with control groups. It is, however, important to note that our HIV– control group mainly included patients with liver disease, a condition supposed to increase serum P-AMY too.<sup>11,27</sup> In our HIV+ population, pancreatic hyperamylasemia was generally mild and in most patients far lower than the best decision limit for acute pancreatitis (ie, >3 times the URL). Moreover, in almost half of hyperamylasemic patients, lipase concentrations were normal, indicating a nonpancreatic origin of their P-AMY increase. Only three HIV+ patients with pancreatic hyperamylasemia reaching a level compatible with overt pancreatitis showed a frank pancreatic disease, with one having a discharge diagnosis of acute disease (Table 3). Our results partly oppose the conclusion of a recently published review assessing the role of HAART in the development of episodes of acute pancreatitis, stating that “drug-induced pancreatitis is frequently not acknowledged, because mild cases, with significant (but not critical) increases in amylase and lipase levels, may go unnoticed, in addition to the possible dissociation at the time of exposure to the drug and the development of acute pancreatitis.”<sup>28</sup>

Another interesting observation is that in our HIV+ population, we found a total of eight cases of MA; this

**Table 1**  
Frequency of Pancreatic Hyperamylasemia in the Studied Population

| Group        | No. of Patients | Patients With P-AMY >URL, No. (%) | P Value | Patients With P-AMY >URL and Lipase ≤URL Relative to all Hyperamylasemic Patients, No. (%) |
|--------------|-----------------|-----------------------------------|---------|--------------------------------------------------------------------------------------------|
| Total        | 1,548           | 221 (14.3)                        |         | 106 (48.0)                                                                                 |
| HIV negative | 92              | 14 (15.2)                         | .91     | 6 (42.9)                                                                                   |
| HIV positive | 1,456           | 207 (14.2)                        |         | 100 (48.3)                                                                                 |
| No therapy   | 123             | 11 (8.9)                          | .11     | 4 (36.4)                                                                                   |
| HAART        | 1,333           | 196 (14.7)                        |         | 96 (49.0)                                                                                  |

HAART, highly active antiretroviral therapy; HIV, human immunodeficiency virus; P-AMY, serum pancreatic amylase; URL, upper reference limit.

**Table 2**  
Characterization of Patients With Macroamylasemia

| Age, y | Sex    | Category        | Supernatant P-AMY Residual Activity, % | P-AMY, U/L | Lipase, U/L | P-AMY/Lipase Ratio |
|--------|--------|-----------------|----------------------------------------|------------|-------------|--------------------|
| 47     | Male   | HIV+ on HAART   | 11                                     | 103        | 22          | 4.68               |
| 46     | Male   | HIV+ on HAART   | 15                                     | 62         | 41          | 1.51               |
| 67     | Female | HIV+ on HAART   | 18                                     | 110        | 31          | 3.55               |
| 62     | Male   | HIV+ on HAART   | 18                                     | 137        | 27          | 5.07               |
| 48     | Male   | HIV+ on HAART   | 20                                     | 719        | 41          | 17.54              |
| 57     | Male   | HIV+ on HAART   | 33                                     | 136        | 16          | 8.50               |
| 41     | Male   | HIV+ no therapy | 34                                     | 59         | 64          | 0.92               |
| 36     | Male   | HIV+ on HAART   | 34                                     | 413        | 31          | 13.32              |

HAART, highly active antiretroviral therapy; HIV, human immunodeficiency virus; P-AMY, serum pancreatic amylase.



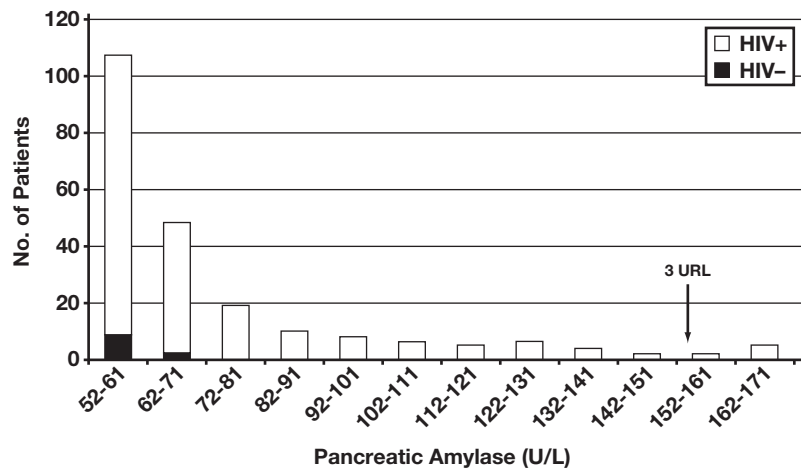

■Figure 1■ Frequency distribution of pancreatic hyperamylasemia in the studied population. URL, upper reference limit.

■Table 3■  
Characterization of Patients With Marked Pancreatic Hyperamylasemia, Defined as Concentrations More Than Three Times the Upper Reference Limit

| Age, y | Category <sup>a</sup> | P-AMY, U/L | Lipase, U/L | P-AMY/ Lipase Ratio | Serum Creatinine, mg/dL | Diagnosis                                             |
|--------|-----------------------|------------|-------------|---------------------|-------------------------|-------------------------------------------------------|
| 40     | HIV+ on HAART         | 160        | 267         | 0.60                | 0.88                    | Acute pancreatitis                                    |
| 53     | HIV+ on HAART         | 161        | 286         | 0.56                | 0.73                    | Chronic pancreatitis                                  |
| 50     | HIV–                  | 184        | 114         | 1.61                | 1.72                    | Chronic pancreatitis                                  |
| 34     | HIV+ no therapy       | 214        | 258         | 0.83                | 0.46                    | Chronic pancreatic hyperenzymemia of undefined origin |
| 49     | HIV+ on HAART         | 270        | 469         | 0.58                | 0.70                    | Chronic pancreatitis                                  |
| 36     | HIV+ on HAART         | 413        | 31          | 13.32               | 0.87                    | Macroamylasemia                                       |
| 48     | HIV+ on HAART         | 719        | 41          | 17.54               | 0.99                    | Macroamylasemia                                       |

HAART, highly active antiretroviral therapy; HIV, human immunodeficiency virus; P-AMY, serum pancreatic amylase.  
<sup>a</sup>All male patients.

corresponds to an MA incidence of 0.55%, which is not so different from the 1% figure reported in the general population.<sup>11</sup> Although it is well known that MA may be also detected in the presence of normal serum AMY values,<sup>17</sup> and therefore our finding in hyperamylasemic patients may be underestimated, it is clear that we were unable to confirm the high incidence of MA in the HIV+ population (13%) found by Foo and Konecny<sup>9</sup> in their pioneering study. We would emphasize that the PEG precipitation method used in our study may have some limitations, mainly when serum globulins are present in excess, as in hypergammaglobulinemic HIV+.<sup>29</sup> However, in these conditions, PEG precipitation may produce false-positive macroenzyme results, so that a spurious increase in MA incidence as method interference theoretically would be expected. On the other hand, confirmatory techniques, such as electrophoretic separation or gel filtration chromatography, are too cumbersome to be applied in large-scale studies such as ours, not to mention that some authors did not recommend electrophoresis for

use in the detection of MA because of the large variability in migration patterns.<sup>30</sup>

We are aware that our study has a major limitation represented by the relatively small number of patients in the control groups (HIV– and untreated HIV+). This can make it difficult to compare the prevalence of pancreatic hyperamylasemia. However, the evaluated population represents the real-life consecutive patients referred to our infectious disease clinic in a time period of 6 months.

In conclusion, in our study, both HIV infection per se and HAART did not increase the frequency of P-AMY elevation. Furthermore, when present, pancreatic hyperamylasemia was generally mild, and frank pancreatic disease, especially acute pancreatitis, was relatively infrequent in this clinical setting. As a consequence, the use of P-AMY measurement as a screening test for detecting pancreatic injury in asymptomatic HIV+ individuals is not recommended. Further studies are needed to determine factors univocally associated with the risk of pancreatic injury development to

identify the subset of HIV+ patients who should selectively be evaluated and monitored using pancreatic enzymes.

*Corresponding author: Dominika Szöke, MD, PhD, UOC Patologia Clinica, Azienda Ospedaliera "Luigi Sacco," Via GB Grassi 74, 20157 Milano, Italy; szoke.dominika@hsacco.it.*

*Conflict of interest: none declared.*

## References

- Lambertus MW, Anderson RE. Hyperamylasemia in patients with human immunodeficiency virus infection. *N Engl J Med*. 1990;323:1708-1709.
- Manfredi R, Calza L. HIV infection and the pancreas: risk factors and potential management guidelines. *Int J STD AIDS*. 2008;19:99-105.
- Dutta SK, Ting CD, Lai LL. Study of prevalence, severity, and etiological factors associated with acute pancreatitis in patients infected with human immunodeficiency virus. *Am J Gastroenterol*. 1997;92:2044-2048.
- Guo JJ, Jang R, Louder A, et al. Acute pancreatitis associated with different combination therapies in patients infected with human immunodeficiency virus. *Pharmacotherapy*. 2005;25:1044-1054.
- Reisler RB, Murphy RL, Redfield RR, et al. Incidence of pancreatitis in HIV-1-infected individuals enrolled in 20 adult AIDS clinical trials group studies: lessons learned. *J Acquir Immune Defic Syndr*. 2005;39:159-166.
- Reisler RB, Han C, Burman WJ, et al. Grade 4 events are as important as AIDS events in the era of HAART. *J Acquir Immune Defic Syndr*. 2003;34:379-386.
- Smith CJ, Olsen CH, Mocroft A, et al. The role of antiretroviral therapy in the incidence of pancreatitis in HIV-positive individuals in the EuroSIDA study. *AIDS*. 2008;22:47-56.
- Raza S, Chaudhry NA, Brown JD, et al. To study the clinical, biochemical and radiological features of acute pancreatitis in HIV and AIDS. *J Clin Med Res*. 2013;5:12-17.
- Foo Y, Konecny P. Hyperamylasaemia in asymptomatic HIV patients. *Ann Clin Biochem*. 1997;34:259-262.
- Fessel J, Hurley LB. Incidence of pancreatitis in HIV-infected patients: comment on findings in EuroSIDA cohort. *AIDS*. 2008;22:145-147.
- Panteghini M, Bais R. Serum enzymes. In: CA Burtis, ER Ashwood, DE Bruns, eds. *Tietz Textbook of Clinical Chemistry and Molecular Diagnostics*. 5th ed. St Louis, MO: Elsevier Saunders; 2012:565-598.
- American Gastroenterological Association (AGA) Institute on "Management of Acute Pancreatitis" Clinical Practice and Economics Committee; AGA Institute Governing Board. AGA Institute medical position statement on acute pancreatitis. *Gastroenterology*. 2007;132:2019-2021.
- Tenner S, Baillie J, DeWitt J, et al. American College of Gastroenterology Guideline: management of acute pancreatitis. *Am J Gastroenterol*. 2013;108:1400-1415.
- Panteghini M, Ceriotti F, Pagani F, et al; Italian Society of Clinical Biochemistry and Clinical Molecular Biology (SIBioC) Working Group on Enzymes. Recommendations for the routine use of pancreatic amylase measurement instead of total amylase for the diagnosis and monitoring of pancreatic pathology. *Clin Chem Lab Med*. 2002;40:97-100.
- Panteghini M. Laboratory evaluation of the pancreas. In: W Clarke, ed. *Contemporary Practice in Clinical Chemistry*. 2nd ed. Washington, DC: AACC Press; 2011:333-341.
- Hancock MR, Smith NA, Hawkins DA, et al. Biochemical assessment of pancreatic disease in human immunodeficiency virus infected men. *J Clin Pathol*. 1997;50:674-676.
- Wyness SP, Yee MA, La'ulu SL, et al. Multiple macroenzymes in a patient with AIDS. *Am J Clin Pathol*. 2014;142:266-268.
- Argiris A, Mathur-Wagh U, Wilets I, et al. Abnormalities of serum amylase and lipase in HIV-positive patients. *Am J Gastroenterol*. 1999;94:1248-1252.
- Panteghini M, Pagani F. Diagnostic value of measuring pancreatic isoamylase with a double-monoclonal antibody immunoassay in serum of hospitalized hyperamylasemic patients. *J Clin Lab Anal*. 1990;4:449-452.
- Panteghini M, Bonora R, Pagani F. Measurement of pancreatic lipase activity in serum by a kinetic colorimetric assay using a new chromogenic substrate. *Ann Clin Biochem*. 2001;38:365-370.
- Braga F, Infusino I, Panteghini M. Role responsibilities of laboratory medicine specialists in the verification of metrological traceability of in vitro medical diagnostics. *J Med Biochem*. 2015;34:1-6.
- Davidson DF, Watson DJ. Macroenzyme detection by polyethylene glycol precipitation. *Ann Clin Biochem*. 2003;40:514-520.
- Wyness SP, Hunsaker JJH, La'ulu SL, et al. Detection of macro-creatinine kinase and macroamylase by polyethylene glycol precipitation and ultrafiltration methods. *Clin Chim Acta*. 2011;412:2052-2057.
- Junge W, Abicht K, Goldman J, et al. Evaluation of the colorimetric liquid assay for pancreatic lipase on Hitachi analyzers in 7 clinical centers in Europe, Japan and USA. *Clin Chem*. 1999;45:A51.
- Clinical and Laboratory Standards Institute. *Defining, Establishing, and Verifying Reference Intervals in the Clinical Laboratory; Approved Guideline*. 3rd ed. Wayne, PA: Clinical and Laboratory Standards Institute; 2008. CLSI document C28-A3c.
- Junge W, Wortmann W, Wilke B, et al. Development and evaluation of assays for the determination of total and pancreatic amylase at 37°C according to the principle recommended by the IFCC. *Clin Biochem*. 2001;34:607-615.
- Pezzilli R, Andreone P, Morselli-Labate AM, et al. Serum pancreatic enzyme concentrations in chronic viral liver diseases. *Dig Dis Sci*. 1999;44:350-355.
- Oliveira NM, Ferreira FA, Yonamine RY, et al. Antiretroviral drugs and acute pancreatitis in HIV/AIDS patients: is there any association? A literature review. *Einstein*. 2014;12:112-119.
- Fahie-Wilson M, Halsall D. Polyethylene glycol precipitation: proceed with care. *Ann Clin Biochem*. 2008;45:233-235.
- Klonoff DC. Macroamylasemia and other immunoglobulin-complexed enzyme disorders. *West J Med*. 1980;133:392-407.

# First and Only FDA Cleared Digital Cytology System

**Genius™ Cervical AI**

**Genius™ Review Station**

**Genius™ Digital Imager**

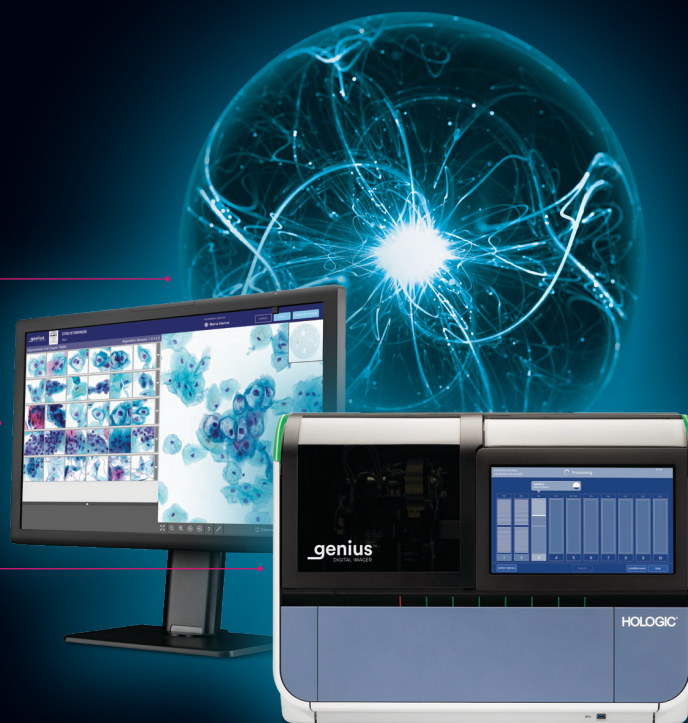

## Empower Your Genius With Ours

**Make a Greater Impact on Cervical Cancer**  
with the Advanced Technology of the  
Genius™ Digital Diagnostics System

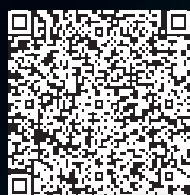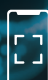

**Click or Scan**  
to discover more

ADS-04159-001 Rev 001 © 2024 Hologic, Inc. All rights reserved. Hologic, Genius, and associated logos are trademarks and/or registered trademarks of Hologic, Inc. and/or its subsidiaries in the United States and/or other countries. This information is intended for medical professionals in the U.S. and other markets and is not intended as a product solicitation or promotion where such activities are prohibited. Because Hologic materials are distributed through websites, podcasts and tradeshows, it is not always possible to control where such materials appear. For specific information on what products are available for sale in a particular country, please contact your Hologic representative or write to [diagnostic.solutions@hologic.com](mailto:diagnostic.solutions@hologic.com).

**genius™**  
DIGITAL DIAGNOSTICS
